# Supplementary material for: Virus-mediated export of chromosomal DNA in plants
Source: PubMed Central journal article supplement (PMC6293997; doi:10.1038/s41467-018-07775-w), 2018-12-13
Supplement: 41467_2018_7775_MOESM1_ESM.pdf [file 41467_2018_7775_MOESM1_ESM.pdf]

Supplementary Information

**Virus-mediated export of chromosomal DNA in plants**

Catoni et al.

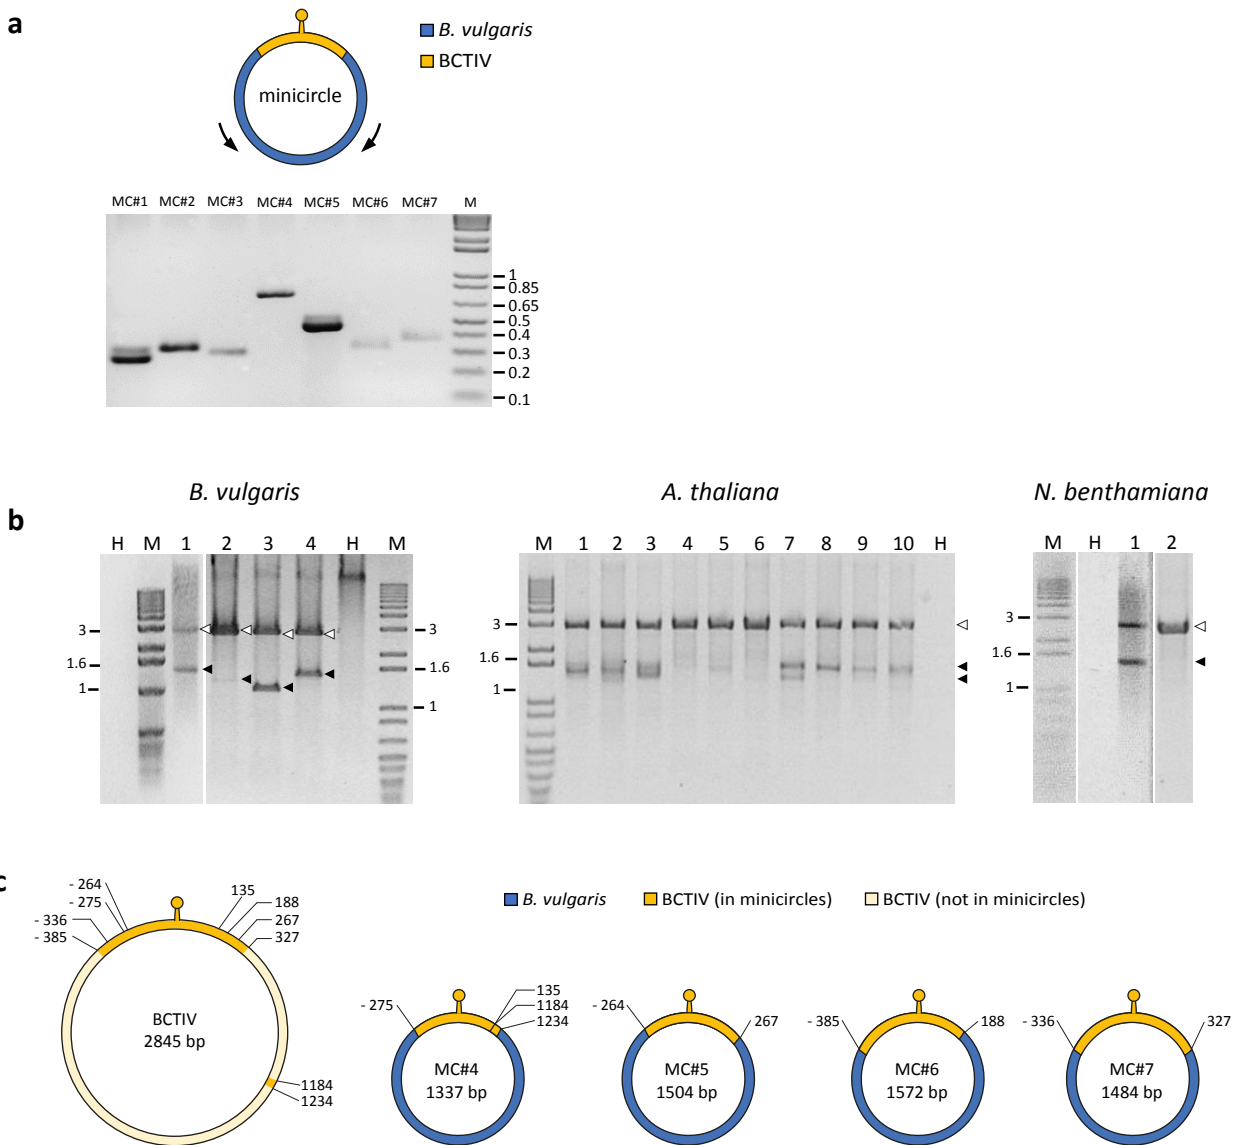

**Supplementary Figure 1. Minicircles are circular hybrid DNA molecules detected in BCTIV-infected *B. vulgaris* plants.**

**a** *In vivo* validation of the origin of the non-viral sequences of minicircles MC#1 to #7 performed by PCR on DNA from healthy *B. vulgaris*. The approximate positions of primers designed on the non-viral portion of minicircles (in blue) are indicated by arrows. Molecular markers (kb) are indicated. Source data are provided as a Source Data file.

**b** DNA fragments obtained after RCA and enzymatic digestion (see Methods) of plant samples (numbered above each lane) inoculated by BCTIV under controlled conditions and collected at 4 wpi. H, healthy control plants. The putative full-length BCTIV genome and associated smaller molecules are indicated by white and black arrows, respectively. M, molecular markers with sizes (kb) indicated. Source data are provided as a Source Data file.

**c** Scheme of the minicircles recovered from *B. vulgaris* plants shown in **b**; MC#4 originates from plant 1, MC#5 from plant 4, and MC#6 and #7 from plant 2. Color code and the coordinates are as in Figure 1b. The complete sequences of the minicircles are reported in Supplementary Data 2.

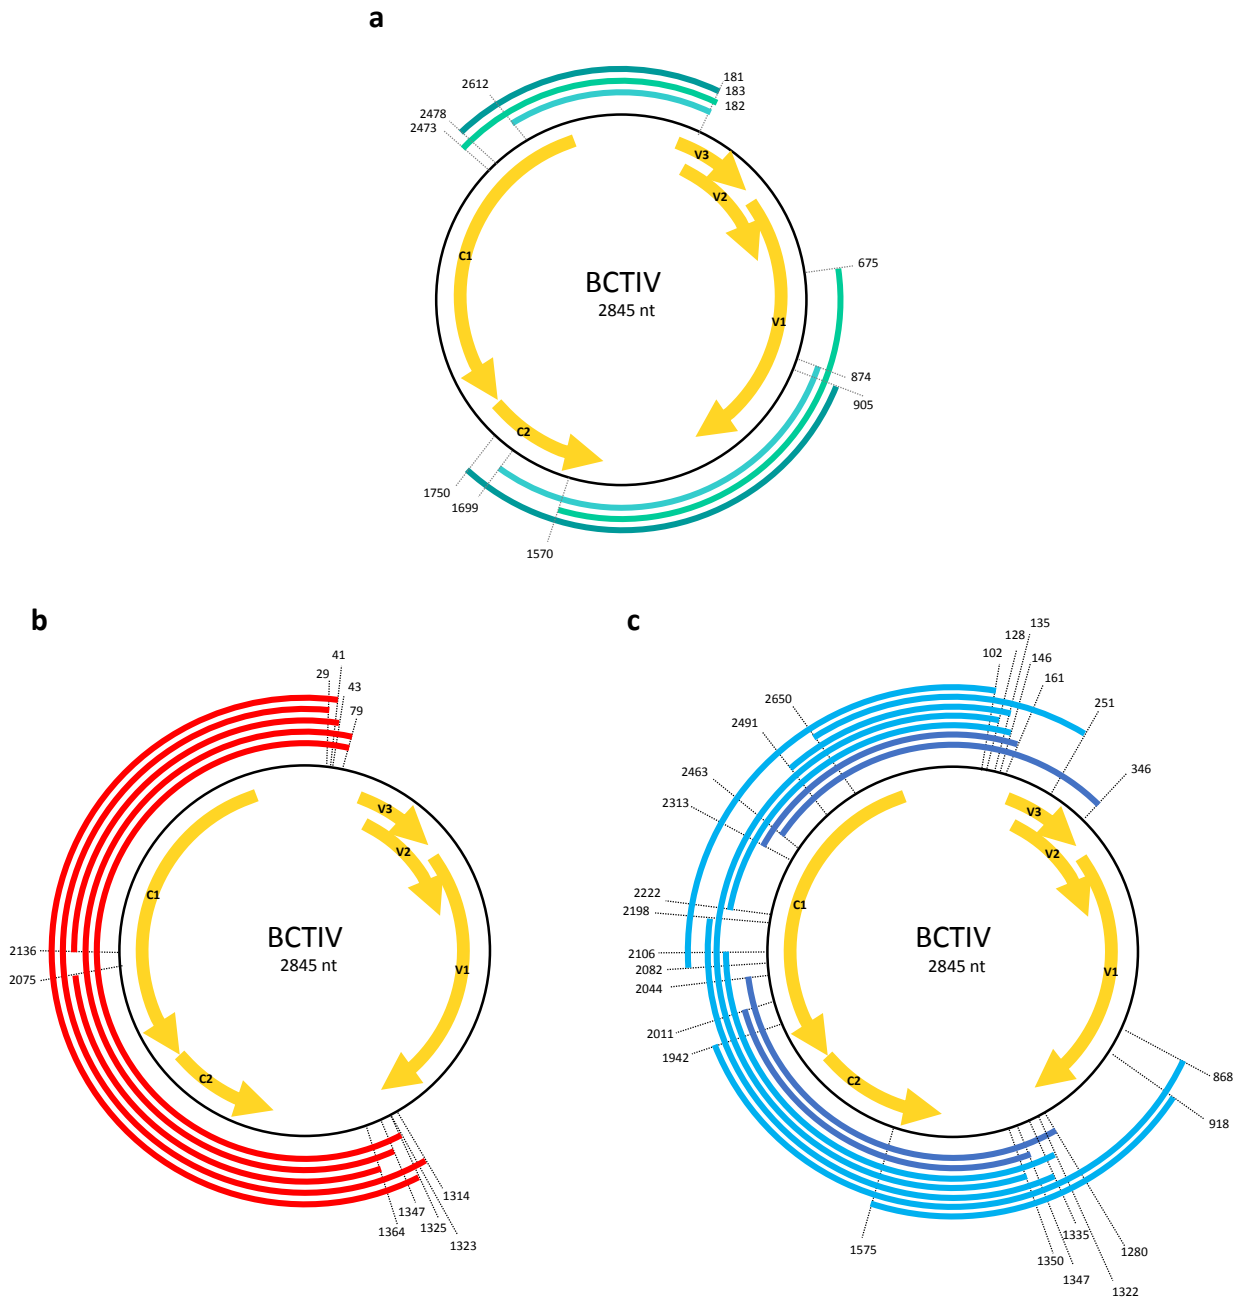

**Supplementary Figure 2. Schematic representation of BCTIV defective molecules cloned from BCTIV-infected plants.**

Defective DNAs cloned from *B. vulgaris* (**a**), *N. benthamiana* (**b**), and *A. thaliana* (**c**) displayed relative to the circular genome of BCTIV. The defective molecules were derived from three *B. vulgaris* plants (plants Nos. 2, 3, and 4 of Supplementary Fig. 1b; lines with three shades of green), one *N. benthamiana* plant (plant No. 1 of Supplementary Fig. 1b; red lines), and two *A. thaliana* plants (plants Nos. 7 and 8 of Supplementary Fig. 1b; lines with two shades of blue). Defective viral derivatives were cloned from RCA products digested with *Apa*I (**a** and **c**) or *Eco*RI (**b**).

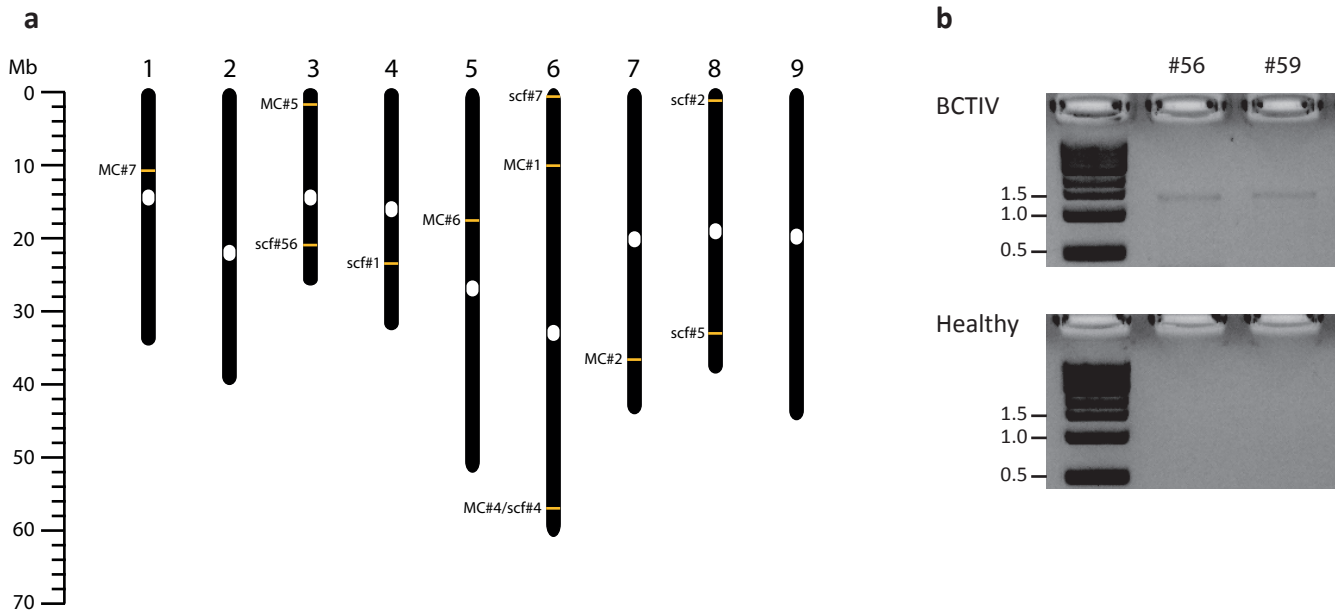

**Supplementary Figure 3. Minicircles include DNA derived from *B. vulgaris* chromosomes.**

**a** Schematic representation (yellow bars) of the chromosomal positions of the non-viral sequences present in eleven minicircles. The nine *B. vulgaris* chromosomes are drawn to the scale (Mb) shown on the left (sequences from RefBeet-1.2.2). Approximate positions of centromeres are indicated by white dots.

**b** *In vivo* validation by inverse PCR of the circular nature of scaffolds #56 and #59. The amplified fragments were sequenced and associated to a single minicircle (sequence reported in Supplementary Data 1). DNA from mock-inoculated *B. vulgaris* (Healthy) was used as a negative control. Molecular markers (kb) are shown on the left. Source data are provided as a Source Data file.

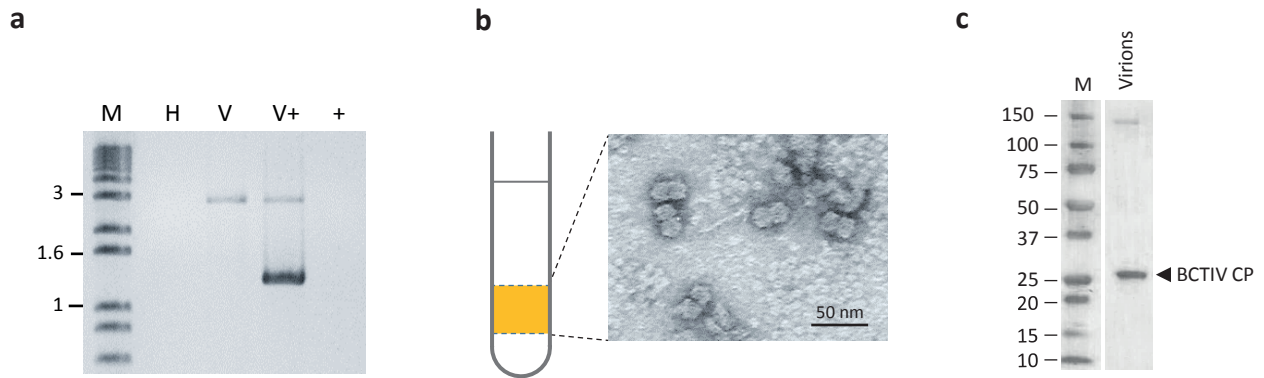

**Supplementary Figure 4. Minicircle DNA replicates in plants and is encapsidated in BCTIV virions.**

**a** PCR amplification of viral DNA from beet plants inoculated with BCTIV alone (V), with BCTIV and MC#1 (V+), or with MC#1 alone (+). H, healthy control. M, molecular markers (kb). Source data are provided as a Source Data file.

**b** Electron micrograph of geminated BCTIV virions purified by sucrose gradient from *N. benthamiana* plants inoculated with BCTIV and MC#1, collected at 4 wpi. Source data are provided as a Source Data file.

**c** SDS-PAGE of proteins extracted from BCTIV virions, stained with Coomassie blue. An arrow indicates the band of 28 kDa, the expected size of the BCTIV coat protein (CP). Lane M, molecular markers with sizes shown on the left (kDa). Source data are provided as a Source Data file.

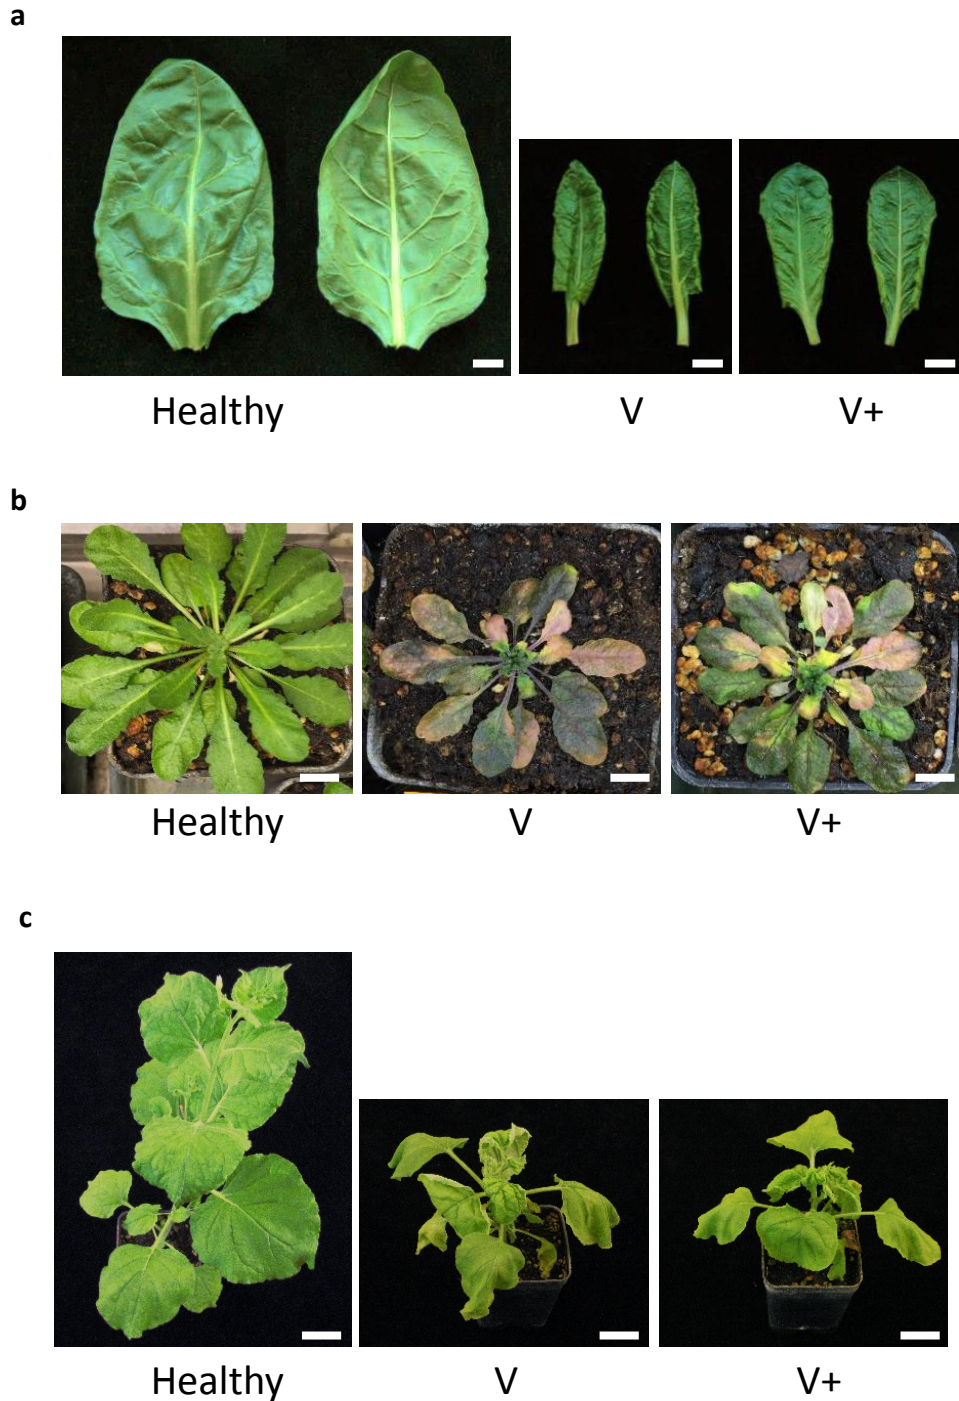

**Supplementary Figure 5. Images of leaves and plants inoculated with BCTIV (V) or with BCTIV and MC#1 (V+), or mock-inoculated plants used as controls (Healthy).**

**a**, *B. vulgaris* (white bars 1 cm), **b**, *A. thaliana*, (white bars 1 cm), and **c**, *N. benthamiana* (white bars 3 cm). Plants were photographed at 3 wpi.

**Supplementary Table 1.** Features of the defective molecules cloned following RCA from plants artificially infected by BCTIV. Identity with BCTIV-Siv (JX082259) is over 99% for all molecules.

| Plant of origin                      | Clone      | Length (nt) | BCTIV-Siv Coverage (%) |
|--------------------------------------|------------|-------------|------------------------|
| <i>B. vulgaris</i> <sup>(a)</sup>    | DEF-Bv7/3  | 1378        | 100                    |
|                                      | DEF-Bv8/9  | 1238        | 100                    |
|                                      | DEF-Bv9/7  | 1428        | 100                    |
| <i>N. benthamiana</i> <sup>(b)</sup> | DEF-Nb1/14 | 1561        | 100                    |
|                                      | DEF-Nb1/12 | 1595        | 100                    |
|                                      | DEF-Nb1/11 | 1573        | 100                    |
|                                      | DEF-Nb1/7  | 1451        | 100                    |
|                                      | DEF-Nb1/6  | 1556        | 100                    |
| <i>A. thaliana</i> <sup>(c)</sup>    | DEF-At1/2  | 1492        | 100                    |
|                                      | DEF-At1/7  | 1359        | 100                    |
|                                      | DEF-At2/1  | 1541        | 100                    |
|                                      | DEF-At2/3  | 1620        | 100                    |
|                                      | DEF-At2/4  | 1346        | 100                    |
|                                      | DEF-At2/7  | 1546        | 98 <sup>(d)</sup>      |
|                                      | DEF-At2/8  | 1521        | 100                    |

(a) *B. vulgaris* clones derive from three plants (Bv7, Bv8 and Bv9)

(b) *N. benthamiana* clones derive from a single plant (Nb1)

(c) *A. thaliana* clones derive from two plants (At1 and At2)

(d) Presence of an insertion of unknown origin AATTATACTAGATATTTATAAGGACAG (27bp)

## Supplementary Table 2. Primers used in this study

| <b>Name</b>                                                           | <b>Sequence 5' &gt; 3'</b>     |
|-----------------------------------------------------------------------|--------------------------------|
| <b><u>#MC1 amplification</u></b>                                      |                                |
| MC#1_173F                                                             | GACGAGTCCGACACAATACG           |
| MC#1_893R                                                             | TGCGAGATGGTAGTGGTGAA           |
| 1L-5_342F                                                             | CGTCCTTTGTTTTTCATTCTGC         |
| 1L-5_597R                                                             | TGAAGACTCGAATGCACTTGT          |
| <b><u>#MC2 amplification</u></b>                                      |                                |
| 1BC_1_664F                                                            | AGGCTAGTGTTAGATCTTTTGCA        |
| 1BC_1_552F                                                            | CCACATTCCCAAACATACCA           |
| 1BC_1_979R                                                            | CACCTTGATGACGACGTGAC           |
| <b><u>#MC3 amplification</u></b>                                      |                                |
| 1-8BC-734F                                                            | CATCCAAGATTCAAGCCCTT           |
| 1-8BC-1011R                                                           | TTTGCAGGTGTATCAACAGGTC         |
| <b><u>#MC4 amplification</u></b>                                      |                                |
| 6ast11nv_308F                                                         | TGAACTGAAATTAAGTCTAAAAGAACA    |
| 6ast11nv_1010R                                                        | TTAGTAACAACGATAAAAATTTGGTG     |
| <b><u>#MC5 amplification</u></b>                                      |                                |
| MCBv9-1F                                                              | CCCTGCCAAATCTAGACCCA           |
| MCBv9-1R                                                              | ACGAGTTGGGGAAGTAAAAGAAC        |
| <b><u>#MC6 amplification</u></b>                                      |                                |
| BV7_9_857F                                                            | TTTGTGTTTTCGTCCTCCAAA          |
| MCBv7-9F                                                              | CACTGAGTTTCCACAAGAGTC          |
| MCBv7-9R                                                              | GGTGTCAAAGATTTCAAGGTTTCG       |
| <b><u>#MC7 amplification</u></b>                                      |                                |
| MCBv7-18F                                                             | TGTAATCCCTCCATTCCAGA           |
| MCBv7-18R                                                             | AGTGTGGGCCAAAAGAGTTT           |
| <b><u>Inverse PCR for validation of scaffolds circular nature</u></b> |                                |
| mcirc_beta_scf1_F                                                     | TCCAATACCGTCGTTTTGGTT          |
| mcirc_beta_scf1_R                                                     | TGTGGGATCTTGTTAGATTCGTCT       |
| mcirc_beta_scf2_F                                                     | CGCGCACAAAATAGGATGCA           |
| mcirc_beta_scf2_R                                                     | TCTGAAATCTTGACACATTCACAAC      |
| mcirc_beta_scf4_F                                                     | AGCTAAATTAATTCCTCACTACAAC      |
| mcirc_beta_scf4_R                                                     | AGAAATTTATGCAGATAAATACGTCAGACT |
| mcirc_beta_scf5_F                                                     | AGAAAACACAGAAACGGCCA           |
| mcirc_beta_scf5_R                                                     | TGTCCGTTGTAGTACGAGATTCA        |
| mcirc_beta_scf7_F                                                     | GGCTTAACCTTTGCGGCTTT           |
| mcirc_beta_scf7_R                                                     | ACAATTGCGACACCAGTACAA          |
| mcirc_beta_scf33_F                                                    | TGTTCCAAAACATGCTCAGCA          |
| mcirc_beta_scf33_R                                                    | TGTCAATGCACAATTTTGCCCA         |
| mcirc_beta_scf56_F                                                    | TGTGGAACATCTCCCGCTTT           |
| mcirc_beta_scf56_R                                                    | TGACGATCGTAGTTTTTATGAAGGA      |



mcirc\_beta\_scf59\_F TGTCGGACCAAACCTTGTGCT  
mcirc\_beta\_scf59\_R TATGGAGTGTGCCTAGGCCT

MC#1 transcription

MC#1\_176F GAGTCCGACACAATACGTTCTC  
MC#1\_406R ACACTTGTGCCATTGTGCAT

BCTIV amplification

BCTIV\_42F ACGGTTGAGTGGGGAACAC  
BCTIV\_2820R TCCCTCTTCTCCCTCTCA  
BCTIV\_75F TTAAAGTAAAGTAGCACTAAGTGGG  
BCTIV\_2744R ATTGTACGGAAGAGGGAAAC

qPCR on total DNA

qPCR\_scaf1\_betaBV\_F CATGTATTCTCCCCTCGTCACA  
qPCR\_scaf1\_betaBV\_R TGGGTTGGATTACTGGAACACA  
qPCR\_scaf2\_betaBV\_F ACGCGCACAAAATAGGATGC  
qPCR\_scaf2\_betaBV\_R ACGGGATAGATGTAGCATTGTCC  
qPCR\_scaf4\_betaBV\_F ACGTTCTAATGCAACGGTTGAC  
qPCR\_scaf4\_betaBV\_R TGCATTAGTGTATCCGTTGCAAA  
qPCR\_scaf5\_betaBV\_F TGTTGACGCACAATTTTGACCA  
qPCR\_scaf5\_betaBV\_R GGATAGTGACCTAGCACACAACA  
qPCR\_scaf7\_betaBV\_F GTTCGCAATTAACAATTCACCAACTT  
qPCR\_scaf7\_betaBV\_R TGTAACAGCTCGTCTTATCCATTGA  
qPCR\_scaf33\_betaBV\_F TGGGCAAAATTGTGCATTGACA  
qPCR\_scaf33\_betaBV\_R AGCCCATATTATCCCAAGTTCCC  
qPCR\_scaf56\_betaBV\_F ATTTCTTCATAAAAACACTACGATCGTCA  
qPCR\_scaf56\_betaBV\_R TCCCTATAAAAAGCGGGAGATGTTT  
BvGAPDH\_F TGCACCGATGTTTGTGTCG  
BvGAPDH\_R GGGAGCAAGGCAATTTGTGG  
qPCR\_BCTIV\_C1\_F TTTCTGTTCTGGATGGTCCG  
qPCR\_BCTIV\_C1\_R CTCCAGGAGCCAGACAACAG

Probe synthesis

MC#1\_682F TGATCACCCATGTTAATTCAGC  
MC#1\_925R ACGTCAATGGGAACCTGTATTC  
BCTIRV-F TACAAGTATGGCGGTTT  
BCTIRV-R GAGTAAAGCATTCTCCTTAC

(Soleimani et al., 2013)

(Soleimani et al., 2013)

**Supplementary Table 3.** Metrics from analysis of genome wide DNA sequencing

| Plant              | Condition      | name          | Total paired | Trimming (trimmomatic) |              | Mapping (Segemehl) |              |            | Total kept reads | Genome coverage (average) |
|--------------------|----------------|---------------|--------------|------------------------|--------------|--------------------|--------------|------------|------------------|---------------------------|
|                    |                |               |              | Final trim             | % kept reads | Mapping efficiency | Multimatches | Duplicated |                  |                           |
| <i>B. vulgaris</i> | Healthy        | B vulgaris HH | 15,901,042   | 15,109,660             | 95.02%       | 91.49%             | 40.63%       | 3.03%      | 13,823,828       | 3.57                      |
| <i>B. vulgaris</i> | BCTIV-infected | B vulgaris BT | 30,110,885   | 29,073,207             | 96.55%       | 66.31%             | 28.87%       | 3.57%      | 19,278,444       | 4.92                      |
| <i>A. thaliana</i> | BCTIV-infected | Col-0 BT_7    | 8,916,726    | 8,606,893              | 96.53%       | 90.15%             | 22.40%       | 3.39%      | 7,759,114        | 9.50                      |
| <i>A. thaliana</i> | BCTIV-infected | Col-0 BT_8    | 14,180,521   | 13,429,965             | 94.71%       | 98.77%             | 25.22%       | 7.19%      | 13,264,776       | 15.18                     |
